# Supplementary material
Source: PubMed Central journal article supplement (PMC3003406)

**supplementary information:**

The stable cell line HepAD38 was incubated for 18 h in the presence of the indicated amount of Bortezomib. The medium was removed and replaced by medium containing Bortezomib dissolved in PBS. In case of the control cells the same amount of PBS was added to the medium. 4 h later this procedure was repeated and again 14 h later the supernatant was collected. The amount of viral particles was quantified by real time PCR. HBV-genome quantification was done using COBAS® AmpliPrep/COBAS® TaqMan® HBV test (Roche Diagnostics GmbH, Mannheim, Germany) according to the manufacturer's instructions. The assay shows relative values (the value for untreated control cells was arbitrarily set as 1) that are based on three independent experiments. The cell viability was analyzed by MTT assays. For does up to 50 nM no significant effect on cell viability was observed within 18h, for 100 nM the proportion of metabolically active cells was reduced to 83%

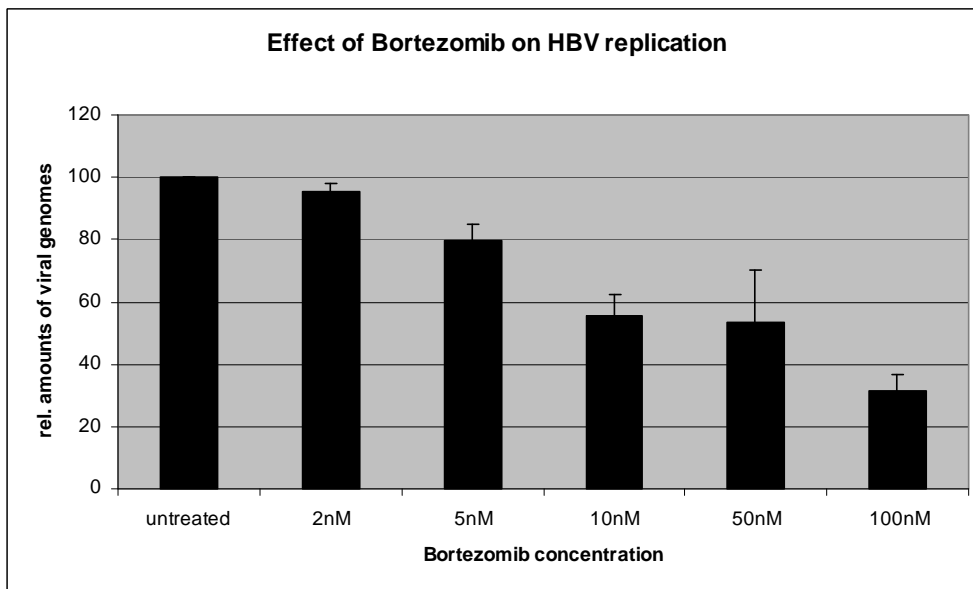

Supplement: supp_M110.145862_jbc.M110.145862-1.pdf [file supp_M110.145862_jbc.M110.145862-1.pdf]
